# Supplementary material
Source: ML conference proceedings conference paper supplement (https://openreview.net/forum?id=hwUAApRXsC)
Supplement: supplementary_material [file appendix.pdf › supplementary/appendix.pdf]

## A APPENDIX

### A.1 LLM USAGE STATEMENT

We clarify that the use of LLMs in this study is restricted to writing assistance, specifically for grammar correction and enhancing readability. No LLM was involved in the research design, experimental execution, or data analysis. The authors take full responsibility for the content of the manuscript, including any text generated or polished by the LLM. We have ensured that the LLM-generated text adheres to ethical guidelines and does not contribute to plagiarism or scientific misconduct.

### A.2 PROMPTS USED IN SEC.3

The prompts are included in the supplementary.zip file as the judge\_prompt.md

### A.3 CODES

Codes are provided in the supplementary.zip file as ACRE\_code.zip
